# Supplementary material
Source: PubMed Central journal article supplement (PMC5622879)
Supplement: 13280_2017_914_MOESM1_ESM.pdf [file 13280_2017_914_MOESM1_ESM.pdf]

## Ambio

Electronic Supplementary Material

*This supplementary material has not been peer reviewed*

### Title page information

## **Governance of Agro-pesticide Through Private Environmental and Social Standards in the Global Cut Flower Chain from Ethiopia**

Belay T. Mengistie <sup>a</sup>, Arthur P. J. Mol <sup>b</sup> and Peter Oosterveer <sup>c</sup>

<sup>a</sup> Ph D research fellow at Environmental policy group of Wageningen University in the Netherlands  
Please address all **correspondence** concerning this manuscript to me at:-  
[belay.mengistie@wur.nl](mailto:belay.mengistie@wur.nl) and/or [belaytizazu@yahoo.com](mailto:belaytizazu@yahoo.com) tel; +31649935129

<sup>b</sup> Was chair and professor at environmental policy group of Wageningen University. Currently, he is Rector Magnificus and vice-president of Wageningen University in the Netherlands  
[arthur.mol@wur.nl](mailto:arthur.mol@wur.nl) Tel.: +31 317 484061,

<sup>c</sup> a professor of sociology at Environmental policy group of Wageningen University in the Netherlands.  
[peter.oosterveer@wur.nl](mailto:peter.oosterveer@wur.nl) tel.: +31 (0)317 485038

<sup>a b c</sup> Hollandseweg 1, 6706, KN, Wageningen, The Netherlands.

**Table S1: List of some pesticide imported by flower growers 2007-2014( Adapted from, Tamiru, 2007, Vieira and Abarca, 2009; MoA, 2014)**

| Insecticides/nematicides    | Fungicides                 | Herbicides       | Growth Regulators    | Postharvest         |
|-----------------------------|----------------------------|------------------|----------------------|---------------------|
| Abamectine                  | Azoxystrobin               | Paraquat         | Faty acids           | Aluminium sulphate  |
| Acephate                    | Benalaxyl + Mancozeb       | Paraquat +Diquat | Glycol ethers        | Chlorine            |
| Acetamiprid                 | Benomyl                    | Diquat           | Paraphini oil        | Citric acid         |
| Acrinathrin                 | Bitertanol                 | Oxidazon         | Ethylene             | Silver thiosulphate |
| Aldicarb                    | Buprimate                  | Glyphosate       | Giberellic acid      | Wetting agent       |
| Alpha-cypermethrin          | Captan                     |                  | Thiobendazole75      |                     |
| Amithraz                    | Carbendazim                |                  | Ammonium chloride 40 |                     |
| Azadrachtin                 | Chloropryfos               |                  |                      |                     |
| Azocyclotin                 | Chlorothalonil + Metalaxyl |                  |                      |                     |
| Bacillus thuringiensis      | Cyprodinil + Fludioxonil   |                  |                      |                     |
| Benfuracarb                 | Dazomet                    |                  |                      |                     |
| Beta-cyfluthrin             | Difenoconazole             |                  |                      |                     |
| Bifenazate                  | Dimethomorph + Mancozeb    |                  |                      |                     |
| Bifenthrin                  | Dithianon                  |                  |                      |                     |
| Bromopropylate              | Dodemorf acetate           |                  |                      |                     |
| Buprofezin                  | Famoxate + Cymoxanil       |                  |                      |                     |
| Cadusafos                   | Fenamidon                  |                  |                      |                     |
| Carbofuran                  | Fenarimol                  |                  |                      |                     |
| Chlorfluazuron              | Fenhexamid                 |                  |                      |                     |
| Chloroperin + Dichlopropene | Fluazinain 38.5%           |                  |                      |                     |
| Chlorphenaphyr              | Flusilazole                |                  |                      |                     |
| Chlorpyrifos                | Folpet                     |                  |                      |                     |
| Clofentezin                 | Fosethyl-aluminuim         |                  |                      |                     |
| Cyhexatin                   | Fosetyl-aluminuim          |                  |                      |                     |
| Cypermethrin                | Fosetyl                    |                  |                      |                     |
| Cyromazine                  | Fosetyl 80%                |                  |                      |                     |
| Deltamethrin                | Hexaconazole               |                  |                      |                     |
| Diafenthiurion              | Imazalil                   |                  |                      |                     |
| Diazinon                    | Iminoctadine               |                  |                      |                     |
| Dichlovos                   | Iprodion                   |                  |                      |                     |
| Dicofol                     | Iprodione                  |                  |                      |                     |
| Dieenochlor                 | Kresoxim-methyl            |                  |                      |                     |
| Dimethoate                  | Mancozeb                   |                  |                      |                     |
| Emamecctinbenzoate          | Mancozeb 80%               |                  |                      |                     |

|                           |                                  |  |  |  |
|---------------------------|----------------------------------|--|--|--|
| Endosulfan                | Mancozeb/Manganese + Zineb       |  |  |  |
| Ethoprophos               | Mepanipyrim                      |  |  |  |
| Etoxazol                  | Mefenoxam (Metalaxyl-M)          |  |  |  |
| Fenamiphos                | Metalaxyl + Mancozeb             |  |  |  |
| Fenazaquin                | Metalaxyl 25%                    |  |  |  |
| Fenbutatin oxide          | Metalaxyl M                      |  |  |  |
| Fenpropathrin             | Metalaxyl M 8% +                 |  |  |  |
| Fentinacetate54%+Maneb28% | Mancozeb 64%                     |  |  |  |
| Flufenoxuron              | Methram complex                  |  |  |  |
| Hexaflumuron              | Methylbromide                    |  |  |  |
| Hexithiazox               | Mono&Dipotassium phosphate       |  |  |  |
| Imidacloprid              | Myclobutanil                     |  |  |  |
| Indoxacarb                | Oxcarboxin                       |  |  |  |
| Lambda-cyhalothrin        | Penconazole                      |  |  |  |
| Lufenuron                 | Pentachloronitrobenzene          |  |  |  |
| Methiocarb                | E.Triazole                       |  |  |  |
| Methomyl                  | Prochloraz manganese             |  |  |  |
| Methomyl 90%              | Polyoxin                         |  |  |  |
| Monocrotophos             | Polyoxin Al                      |  |  |  |
| Omethoate                 | Propamocarb + fosetyl            |  |  |  |
| Oxamyl                    | Propamocarb HCL                  |  |  |  |
| Oxymatrin                 | Propiconazole                    |  |  |  |
| Phytoseiulus Persimilis   | Propineb                         |  |  |  |
| Primicarb                 | Proplant SL                      |  |  |  |
| Primidafen                | Propynel + Iprovalicarb          |  |  |  |
| Profenofos                | Pyrifenox                        |  |  |  |
| Propargite                | Pyrimethanil                     |  |  |  |
| Pymetrozine               | Didecyldimethylammonium chloride |  |  |  |
| Sodium fluosilicate(bait) | Spiroxamine                      |  |  |  |
| Spinosad                  | Strobilurin + Anilide            |  |  |  |
| Spiromesifen              | Sulfur + Tetraconazole           |  |  |  |
| Tau fluvalinate 24%       | Tebeconazole                     |  |  |  |
| Tebufenpyrad              | Tebuconazole                     |  |  |  |
| Teflubenzuron             | Tetraconazole                    |  |  |  |
| Tetradifon                | Thiabendazole                    |  |  |  |
| Thiacloprid               | Thiophanate-methyl               |  |  |  |

|                    |                     |  |  |  |
|--------------------|---------------------|--|--|--|
| Thiamethoxam       | Thiram 80%          |  |  |  |
| Thiocyclam         | Tolclofos methyl    |  |  |  |
| Thiophonate-methyl | Tolfluazinide 50.5% |  |  |  |
|                    | Tolyfluamide        |  |  |  |
|                    | Triadimefon         |  |  |  |
|                    | Trifloxystrobin     |  |  |  |
|                    | Triforine           |  |  |  |
